# Supplementary material for: Nanoengineered Fe3O4–GO nanoscrolls: exploring the biofunctional applications through magnetic, optical, structural, and morphological analyses
Source: Royal Society of Chemistry journal article supplement (doi:10.1039/d4nj00653d), 2024-01-01
Supplement: d4nj00653d1.pdf [file d4nj00653d1.pdf]

## Supplimentary Information

### Nanoengineered Fe<sub>3</sub>O<sub>4</sub>-GO Nanoscrolls: Exploring the Biofunctional Applications through Magnetic, Optical, Structural, and Morphological Analyses

Mubeena Rafi<sup>a</sup>, Anshida Mayeen<sup>a</sup>, Honey John<sup>a,c,\*</sup> and Pramod Gopinath<sup>a,b,\*</sup>

<sup>a</sup>Inter University Centre for Nanomaterials and Devices (IUCND)

<sup>b</sup>International School of Photonics

<sup>c</sup>Department of Polymer Science and Rubber Technology

Cochin University of Science and Technology, Kochi-682022, India

\*Corresponding author E-mail: [pramod@cusat.ac.in](mailto:pramod@cusat.ac.in) , [honey@cusat.ac.in](mailto:honey@cusat.ac.in)

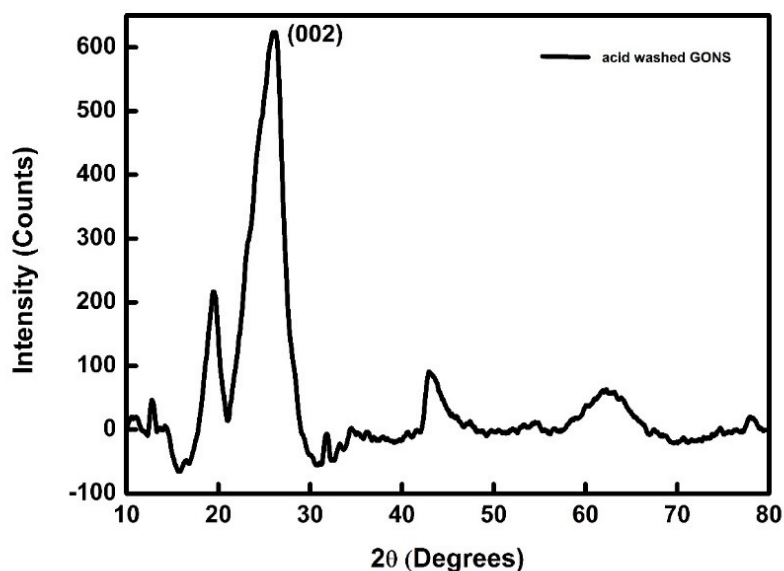

Figure S1 : XRD pattern of acid washed samples

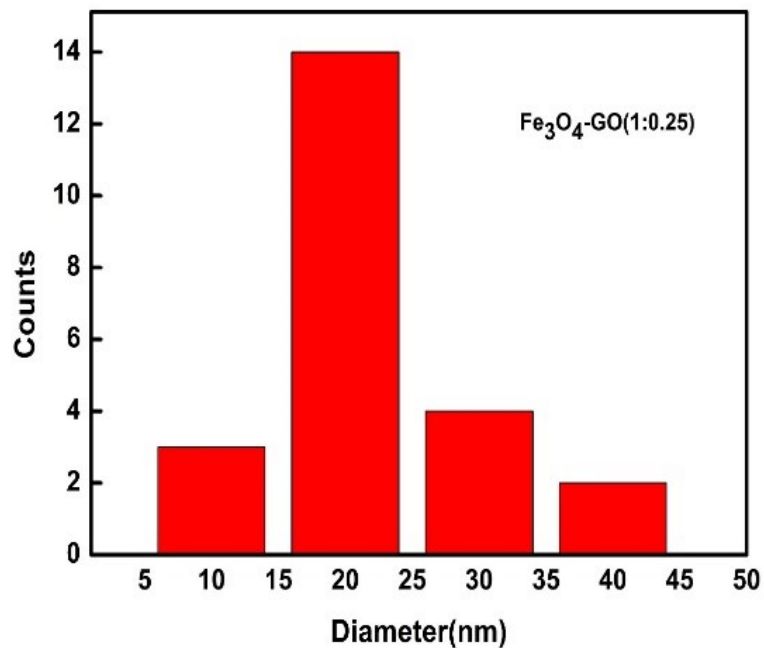

Figure S2 : Histogram representing diameter of nanoscroll.

| Sample                             | $M_S$<br>(emu/gm)  | $M_r$ (emu/gm)                      | Squareness<br>Ratio<br>( $M_r/ M_S$ ) | Coercivity (Oe)      |
|------------------------------------|--------------------|-------------------------------------|---------------------------------------|----------------------|
| <b>Fe<sub>3</sub>O<sub>4</sub></b> | 59.0 ( $\pm 0.6$ ) | 0.220 ( $\pm 2 \times 10^{-4}$ )    | 0.0037                                | 3.95 ( $\pm 0.040$ ) |
| <b>FGO 0.25</b>                    | 54.4 ( $\pm 0.5$ ) | 0.072 ( $\pm 7 \times 10^{-4}$ )    | 0.0013                                | 1.56 ( $\pm 0.010$ ) |
| <b>FGO 0.5</b>                     | 37.0 ( $\pm 0.3$ ) | 0.013 ( $\pm 1 \times 10^{-4}$ )    | 0.0003                                | 0.33 ( $\pm 0.003$ ) |
| <b>FGO 0.75</b>                    | 28.2 ( $\pm 0.2$ ) | 0.006 ( $\pm 0.06 \times 10^{-4}$ ) | 0.0002                                | 0.08 ( $\pm 0.001$ ) |
| <b>FGO 1</b>                       | 14.0 ( $\pm 0.1$ ) | 0.012 ( $\pm 1 \times 10^{-4}$ )    | 0.0008                                | 0.61 ( $\pm 0.006$ ) |

Table S1 : Summary of magnetic behaviour of Fe<sub>3</sub>O<sub>4</sub>-GONS
